## Incidence, mechanisms and clinical impact of largely uncovered struts in current generation drug-eluting-stents: insight from the TRANSFORM-OCT Study

C. Bernelli<sup>1</sup>, D. Pellegrini<sup>2</sup>, I. Pescetelli<sup>2</sup>, R. Garbo<sup>3</sup>, V. Sirbu<sup>2</sup>, L. Fiocca<sup>2</sup>, P. Canova<sup>2</sup>, F. Colombo<sup>3</sup>, A. Cereda<sup>4</sup>, G. Boccuzzi<sup>3</sup>, G.T. Rodriguez Pereira<sup>5</sup>, H. Bezerra<sup>5</sup>, F. Saia<sup>6</sup>, D. Capodanno<sup>7</sup>, G. Guagliumi<sup>2</sup>

<sup>1</sup>Ospedale Santa Corona, Pietra Ligure, Italy; <sup>2</sup>Papa Giovanni XXIII Hospital, Bergamo, Italy; <sup>3</sup>San Giovanni Bosco Hospital of Turin, Turin, Italy;

<sup>4</sup>ASST della Valtellina e dell'Alto Lario, Sondrio, Italy; <sup>5</sup>University Hospitals Case Medical Center, Cleveland, United States of America;

<sup>6</sup>Universitary Hospital Sant'orsola Malpighi, Bologna, Italy; <sup>7</sup>AOU Policlinico - Vittorio Emanuele, Catania, Italy

**Funding Acknowledgement:** Type of funding source: None

**Background:** Thin-strut drug-eluting stents (DES) and optimal implantation technique reduce the rate of stent failure significantly. Nevertheless, uncovered struts (US) have been observed as a key factor for stent thrombosis regardless of stent generation and time of follow-up. Associated factors and temporal evolution are currently unknown.

**Purpose:** To evaluate the prevalence, mechanisms and long-term clinical impact of largely-US after state-of-the-art DES implantation in complex coronary clinical/lesion cohorts

**Methods:** The study was a pre-specified analysis of TRANSFORM-OCT, a randomized controlled trial comparing bioabsorbable or durable polymer DES by serial optical coherence tomography (OCT), obtained at baseline, immediately after procedure, at 3 and 18 months follow-up. Methods and results were published previously. For the current analysis enrolled patients (n=90) were divided in 2 groups according to the amount of US identified by OCT at 3 months: a largely US (LUS  $\geq 30\%$ ) group and the control group ( $<30\%$  US), to evaluate factors associated to LUS, and the clinical impact at follow-up.

**Results:** Out of 90 patients, 31 (34.4%) were assigned to the LUS group, and 59 (65.6%) to the control group. At baseline, LUS patients had larger vessels (reference area  $5.51 \pm 1.1$  vs.  $4.27 \pm 1.5$  mm<sup>2</sup>,  $p=0.001$ ), a higher rate of plaque rupture (41.9 vs. 18.6%,  $p=0.02$ ), thin-cap fibroatheroma (58.1% vs. 51.7%  $p=0.03$ ) and thrombus (58.1% vs. 35.6%,  $p=0.001$ ) as detected by OCT. 98% patients continued dual antiplatelet therapy up to 12 months, and 24% of them up to 18 months.

At stent implant, performed with high pressure dilation ( $21.18 \pm 3.8$  vs  $20.54 \pm 3.6$  atm in LUS vs control group,  $p=0.48$ ), the rate of apposed and embedded struts was high in both groups, although higher in controls ( $93.92 \pm 5.30\%$  vs  $96.46 \pm 3.68\%$ ,  $p=0.03$  and  $16.8 \pm 11.5\%$  vs  $21.7 \pm 15.8\%$ ,  $p=0.12$ , respectively for controls and LUS). At 3 months, US rate was  $48.4 \pm 12\%$  in the LUS group, and  $13.3 \pm 7\%$  in the control group ( $p<0.001$ ). Global malapposition rate was  $7.95 \pm 7.5\%$  and  $1.69 \pm 1.6\%$  ( $p<0.001$ ), respectively.  $84.52 \pm 12.41\%$  of the US in the LUS group and  $86.49 \pm 19.98\%$  in controls group were apposed to the wall ( $p=0.07$ ). At 18 months, the rate of US dropped significantly to  $8.4 \pm 10\%$  in LUS group and  $1.8 \pm 3\%$  in control group ( $p<0.001$ ), with malapposition rate being  $1.4 \pm 3.3$  and  $0.16 \pm 0.43\%$  ( $p=0.006$ ). Of the US,  $81.6 \pm 25.15$  and  $91.11 \pm 21.76\%$  were apposed to the wall, respectively. At 5 years clinical follow-up, no differences were observed at the composite endpoint of major adverse cardiovascular events (detailed data will be presented).

**Conclusions:** In a setting of optimal PCI with modern DES and high-pressure inflation, LUS occur in 30% of patients at early follow-up, more frequently in large vessels with lipid-rich, complex plaques. The vast majority of US is apposed to the wall and near-complete coverage is observed at long-term follow-up, with no clinical impact compared to subjects with a low rate of US.
